# Supplementary material for: Blocked Autophagy Using Lysosomotropic Agents Sensitizes Resistant Prostate Tumor Cells to the Novel Akt Inhibitor AZD5363
Source: Oxford University Press journal article supplement (doi:10.1158/1078-0432.ccr-12-3114), 2012-12-22
Supplement: 10780432ccr123114-sup-fig_legends_pdf_68k.pdf [file 10780432ccr123114-sup-fig_legends_pdf_68k.pdf]

**Supplemental Figure 1. AZD5363 induces apoptosis in LNCaP prostate tumor cell line.** *A*, LNCaP were treated for 48h with AZD5363 at indicated doses. The proportion of cells in subG1, G0-G1, S, or G2-M was determined by propidium iodide staining. *B*, LNCaP cells were treated with 1 $\mu$ M AZD5363 at indicated time points. Protein extracts were analyzed for interest proteins involved in apoptosis pathway.

**Supplemental Figure 2. A, AZD5363 fails to induce apoptosis in PC-3 and DU145 cells.** PC-3 and DU145 cells were treated with AZD5363 (100 $\mu$ M for 48H), staurosporine (1 $\mu$ M for 16H) and MG132 (20 $\mu$ M for 16H). Total proteins were extracted and analyzed by western blot using cleaved PARP and cleaved caspase-3, vinculin was used as a loading control. *B*, **mTOR inhibitor (Rapamycin) induces autophagy.** PC-3 cells were treated with either rapamycin (100nM for 48H) or chloroquine (10 $\mu$ M for 48H) or in combination. Total protein extracts were analyzed by western blotting for LC3-I, LC3-II, p-Akt and its downstream effector pS6 kinase, vinculin was used as the loading control.

**Supplemental Figure 3. Targeting autophagy enhances PI-103 activity to induce apoptosis in PC-3 tumor prostate cells.** PC3 cells were treated with 250 nM of PI-103 alone or in combination with 20 $\mu$ M chloroquine (CHQ) for 48h. Cell proliferation was determined by crystal violet (*A*). Protein extracts were analyzed by western blotting for LC3, Akt, p-Akt, p-S6 and PARP (*B*).

**Supplemental Figure 4. AZD5363 doesn't affect RIP kinase and ROS.** *A*, PC-3 cells were treated with 10  $\mu$ M of AZD5363, rapamycin (50 nM) or PI-103 (0.5, 1  $\mu$ M) for 48 hours. Total proteins were extracted and analyzed by western blot using RIPK, actin was used as a loading control. *B*, PC3 cells were treated with AZD5363 (10 $\mu$ M), Rapamycin (50nM) or PI-103(0.5 $\mu$ M)

for 4 hours respectively followed by incubation with 10  $\mu$ M 2'-7-dichlorodihydrofluoresce diacetate (DCF-DA, Molecular Probes, Invitrogen) for 10 min. Ten thousands live cells were collected and fluorescent signaling was examined by flow-cytometry (BD FACSCanto™ II).
