# Supplementary figures and images for: Blocked Autophagy Using Lysosomotropic Agents Sensitizes Resistant Prostate Tumor Cells to the Novel Akt Inhibitor AZD5363
Source: Oxford University Press journal article supplement (doi:10.1158/1078-0432.ccr-12-3114), 2012-12-22

**Supplemental Figure 1**  
*Lamoureux et al.*

**A**

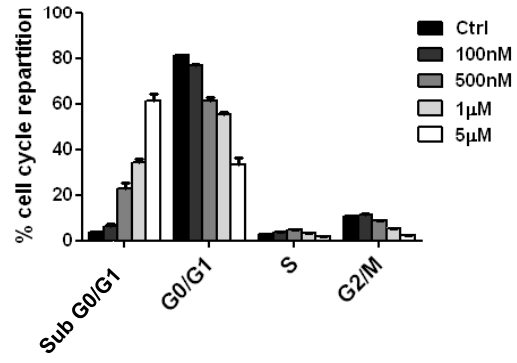

**B**

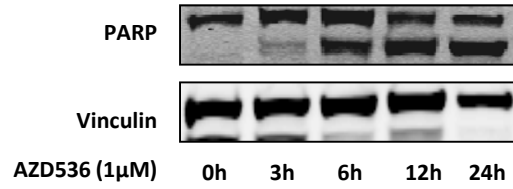

Supplement: 10780432ccr123114-sup-f1_pdf_70k.pdf [file 10780432ccr123114-sup-f1_pdf_70k.pdf]

**Supplemental Figure 2**  
*Lamoureux et al.*

**A**

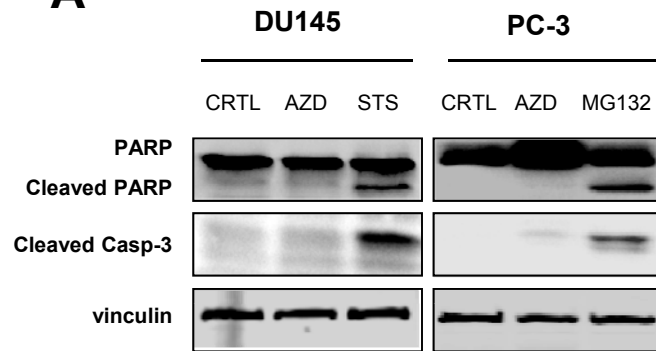

**B**

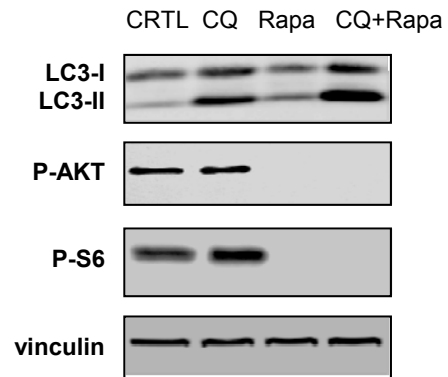

Supplement: 10780432ccr123114-sup-f2_pdf_92k.pdf [file 10780432ccr123114-sup-f2_pdf_92k.pdf]

**Supplemental Figure 3**  
*Lamoureux et al.*

**A**

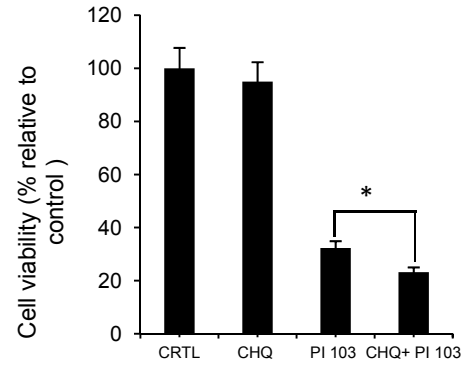

**B**

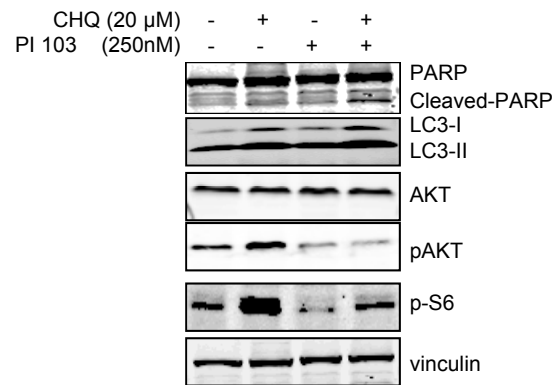

Supplement: 10780432ccr123114-sup-f3_pdf_74k.pdf [file 10780432ccr123114-sup-f3_pdf_74k.pdf]

**Supplemental Figure 4**  
*Lamoureux et al.*

**A**

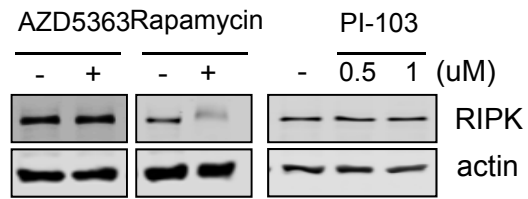

**B**

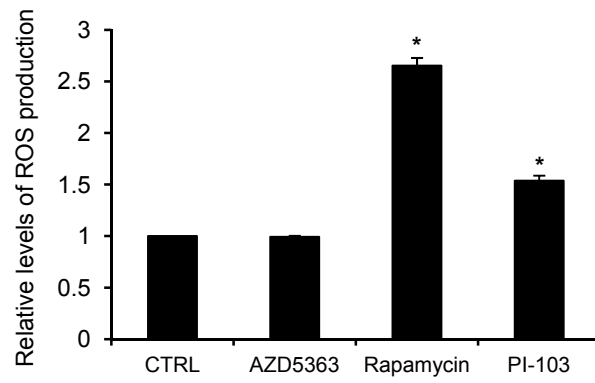

\*:  $p < 0.05$

Supplement: 10780432ccr123114-sup-f4_pdf_56k.pdf [file 10780432ccr123114-sup-f4_pdf_56k.pdf]
